# Supplementary material for: Models of integrated care for multi-morbidity assessed in systematic reviews: a scoping review
Source: PubMed Central journal article supplement (PMC10463690; doi:10.1186/s12913-023-09894-7), 2023-08-23
Supplement: 12913_2023_9894_MOESM2_ESM.pdf [file 12913_2023_9894_MOESM2_ESM.pdf]

## Additional file 2: Excluded studies

| <b>Study ID</b>                              | <b>Reason for exclusion</b>                     |
|----------------------------------------------|-------------------------------------------------|
| 1. Abrams, Watkins et al. (2020)             | Wrong population                                |
| 2. Alyousef, Naughton et al. (2021)          | Wrong intervention                              |
| 3. Bartolo, Pacheco et al. (2019)            | Wrong population                                |
| 4. Brighton, Miller et al. (2019)            | Wrong study design                              |
| 5. Busetto, Luijkx et al. (2016)             | Wrong population                                |
| 6. Chang, Knobf et al. (2019)                | Wrong intervention                              |
| 7. Cimpean and Drake (2011)                  | Wrong study design (no risk of bias assessment) |
| 8. Cui, Dong et al. (2019)                   | Wrong population                                |
| 9. Davidson, Kelly et al. (2022)             | Wrong question type                             |
| 10. Deschodt, Laurent et al. (2020)          | Wrong population                                |
| 11. Flood, Hane et al. (2020)                | Wrong population                                |
| 12. Godinho, Jonnagaddala et al. (2020)      | Wrong intervention                              |
| 13. Green (2013)                             | Wrong study design                              |
| 14. Hendriks, Gallagher et al. (2017)        | Wrong population                                |
| 15. Hudson, Rutherford et al. (2018)         | Wrong setting                                   |
| 16. Hully, Mallah et al. (2022)              | Wrong intervention                              |
| 17. Kemp, Weiner et al. (2018)               | Wrong question type                             |
| 18. Leach, Eaton et al. (2019)               | Wrong population                                |
| 19. Legido-Quigley, Montgomery et al. (2013) | Wrong question type                             |
| 20. Lemmens, Nieboer et al. (2009)           | Wrong population                                |
| 21. Lindegren, Kennedy et al. (2012)         | Wrong population                                |
| 22. Lores, Goess et al. (2019)               | Wrong setting                                   |
| 23. Lv, Kringle et al. (2022)                | Wrong intervention                              |
| 24. McCarter, Britton et al. (2018)          | Wrong setting                                   |
| 25. Medley, Bachanas et al. (2015)           | Wrong population                                |
| 26. Miller, Brighton et al. (2018)           | Wrong population                                |
| 27. Muhula, Gachohi et al. (2022)            | Wrong population                                |
| 28. Nkhoma, Sitali et al. (2022)             | Wrong intervention                              |
| 29. Nugent, Barnabas et al. (2018)           | Wrong question type                             |
| 30. Okusanya, Kimaru et al. (2022)           | Wrong population                                |
| 31. O'Neil, Sanderson et al. (2011)          | Wrong intervention                              |
| 32. Osborn, Demoncada et al. (2006)          | Wrong intervention                              |
| 33. O'Shea, Ledwidge et al. (2022)           | Wrong intervention                              |
| 34. Ouwens, Hulscher et al. (2009)           | Wrong population                                |
| 35. Panagioti, Bower et al. (2016)           | Wrong study design                              |
| 36. Patel and Jafferany (2020)               | Wrong question type                             |
| 37. Patel, Rose et al. (2018)                | Wrong question type                             |
| 38. Poot, Meijer et al. (2021)               | Wrong population                                |

|                                       |                                                 |
|---------------------------------------|-------------------------------------------------|
| 39. Robb and Hanson-Abromeit (2014)   | Wrong population                                |
| 40. Robertson, Baines et al. (2017)   | Wrong intervention                              |
| 41. Rutledge, Redwine et al. (2013)   | Wrong intervention                              |
| 42. Sabri and Gielen (2019)           | Wrong intervention                              |
| 43. Savage, Hegarty et al. (2016)     | Wrong population                                |
| 44. Shaw, Sethi et al. (2019)         | Wrong question type                             |
| 45. Smith, Soubhi et al. (2012)       | Previous version of included review             |
| 46. Socías, Karamouzian et al. (2019) | Wrong population                                |
| 47. Thombs, de Jonge et al. (2008)    | Wrong study design (no risk of bias assessment) |
| 48. Uyei, Coetzee et al. (2011)       | Wrong study design (no risk of bias assessment) |
| 49. Vermunt, Harmsen et al. (2017)    | Wrong intervention                              |
| 50. Zhao, Ma et al. (2022)            | Wrong population                                |

## References

- Abrams, J., D. A. Watkins, L. H. Abdullahi, L. J. Zuhlke and M. E. Engel (2020). "Integrating the prevention and control of rheumatic heart disease into country health systems: A systematic review and meta-analysis." Global Heart **15**(1): 62.
- Alyousef, M., C. Naughton, C. Bradley and E. Savage (2021). "Primary healthcare reform for chronic conditions in countries with high or very high human development index: A systematic review." Chronic Illn: 17423953211059143.
- Bartolo, A., E. Pacheco, F. Rodrigues, A. Pereira, S. Monteiro and I. M. Santos (2019). "Effectiveness of psycho-educational interventions with telecommunication technologies on emotional distress and quality of life of adult cancer patients: a systematic review." Disability and rehabilitation **41**(8): 870-878.
- Brighton, L. J., S. Miller, M. Farquhar, S. Booth, D. Yi, W. Gao, S. Bajwah, W. D. Man, I. J. Higginson and M. Maddocks (2019). "Holistic services for people with advanced disease and chronic breathlessness: a systematic review and meta-analysis." Thorax **74**(3): 270-281.
- Busetto, L., K. G. Luijkx, A. M. J. Elissen and H. J. M. Vrijhoef (2016). "Intervention types and outcomes of integrated care for diabetes mellitus type 2: A systematic review." Journal of Evaluation in Clinical Practice **22**(3): 299-310.
- Chang, P. S., T. Knobf, B. Oh and M. Funk (2019). "Physical and Psychological Health Outcomes of Qigong Exercise in Older Adults: A Systematic Review and Meta-Analysis." The American journal of Chinese medicine **47**(2): 301-322.
- Cimpean, D. and R. E. Drake (2011). "Treating co-morbid chronic medical conditions and anxiety/depression." Epidemiology and psychiatric sciences **20**(2): 141-150.
- Cui, X., W. Dong, H. Zheng and H. Li (2019). "Collaborative care intervention for patients with chronic heart failure: A systematic review and meta-analysis." Medicine **98**(13): e14867.
- Davidson, A. R., J. Kelly, L. Ball, M. Morgan and D. P. Reidlinger (2022). "What do patients experience? Interprofessional collaborative practice for chronic conditions in primary care: an integrative review." BMC primary care **23**(1): 8.
- Deschodt, M., G. Laurent, L. Cornelissen, O. Yip, F. Zúñiga, K. Denhaerynck, M. Briel, A. Karabegovic and S. De Geest (2020). "Core components and impact of nurse-led integrated care models for home-dwelling older people: A systematic review and meta-analysis." Int J Nurs Stud **105**: 103552.
- Flood, D., J. Hane, M. Dunn, S. J. Brown, B. H. Wagenaar, E. A. Rogers, M. Heisler, P. Rohloff and V. Chopra (2020). "Health system interventions for adults with type 2 diabetes in low- And middle-income countries: A systematic review and meta-analysis." PLoS Medicine **17**(11): e1003434.
- Godinho, M. A., J. Jonnagaddala, N. Gudi, R. Islam, P. Narasimhan and S. T. Liaw (2020). "mHealth for Integrated People-Centred Health Services in the Western Pacific: A Systematic Review." International Journal of Medical Informatics **142**: 104259.
- Green, B. B. (2013). "Caring for patients with multiple chronic conditions: Balancing evidenced-based and patient-centered care." Journal of the American Board of Family Medicine **26**(5): 484-485.
- Hendriks, J. M. L., C. Gallagher, R. Mahajan, A. Elliott, M. E. Middeldorp, D. Lau and P. Sanders (2017). "Integrated Care Management in Atrial Fibrillation is associated with improved outcomes - a systematic review and meta-analysis." International Journal of Integrated Care (IJIC) **17**(3): 196-197.

- Hudson, M., G. W. Rutherford, S. Weiser and E. Fair (2018). "Linking private, for-profit providers to public sector services for HIV and tuberculosis co-infected patients: A systematic review." *PloS one* **13**(4): e0194960.
- Hully, A., R. Mallah, G. Villa and Y. Gilleece (2022). "Integrating services to improve quality of care for women living with HIV: A global systematic review." *HIV Med* **23**(4): 310-318.
- Kemp, C. G., B. J. Weiner, K. H. Sherr, L. E. Kupfer, P. K. Cherutich, D. Wilson, E. H. Geng and J. N. Wasserheit (2018). "Implementation science for integration of HIV and non-communicable disease services in sub-Saharan Africa: A systematic review." *AIDS* **32**(Supplement 1): S93-S105.
- Leach, M. J., H. Eaton, T. Agnew, M. Thakkar and M. Wiese (2019). "The effectiveness of integrative healthcare for chronic disease: A systematic review." *International journal of clinical practice* **73**(4): e13321.
- Legido-Quigley, H., C. M. Montgomery, P. Khan, R. Atun, A. Fakoya, H. Getahun and A. D. Grant (2013). "Integrating tuberculosis and HIV services in low- and middle-income countries: A systematic review." *Tropical Medicine and International Health* **18**(2): 199-211.
- Lemmens, K. M., A. P. Nieboer and R. Huijsman (2009). "A systematic review of integrated use of disease-management interventions in asthma and COPD." *Respir Med* **103**(5): 670-691.
- Lindgren, M. L., C. E. Kennedy, D. Bain-Brickley, H. Azman, A. A. Creanga, L. M. Butler, A. B. Spaulding, T. Horvath and G. E. Kennedy (2012). "Integration of HIV/AIDS services with maternal, neonatal and child health, nutrition, and family planning services." *Cochrane database of systematic reviews (Online)* **9**: CD010119.
- Lores, T. J., C. Goess, A. Mikocka-Walus, K. Collins, A. Burke, A. Chur-Hansen, P. Delfabbro and J. M. Andrews (2019). "HEALTHCARE UTILISATION COSTS MAY BE REDUCED BY INTEGRATING PSYCHOLOGICAL CARE INTO IBD MANAGEMENT." *Gastroenterology* **156**(6 Supplement 1): S-834.
- Lv, N., E. A. Kringle and J. Ma (2022). "Integrated Behavioral Interventions for Adults with Comorbid Obesity and Depression: a Systematic Review." *Curr Diab Rep* **22**(4): 157-168.
- McCarter, K., B. Britton, A. L. Baker, S. A. Halpin, A. K. Beck, G. Carter, C. Wratten, J. Bauer, E. Forbes, D. Booth and L. Wolfenden (2018). "Interventions to improve screening and appropriate referral of patients with cancer for psychosocial distress: systematic review." *BMJ open* **8**(1): e017959.
- Medley, A., P. Bachanas, M. Grillo, N. Hasen and U. Amanyeiwe (2015). "Integrating prevention interventions for people living with HIV into care and treatment programs: a systematic review of the evidence." *J Acquir Immune Defic Syndr* **68** Suppl 3(0 3): S286-296.
- Miller, S., L. Brighton, M. Farquhar, S. Booth, D. Yi, W. Gao, S. Bajwah, W. D. C. Man, I. J. Higginson and M. Maddocks (2018). "Holistic services for chronic breathlessness in people with advanced disease: A systematic review and meta-analysis." *European Respiratory Journal* **52**(Supplement 62).
- Muhula, S., J. Gachohi, Y. Kombe and S. Karanja (2022). "Interventions to improve early retention of patients in antiretroviral therapy programmes in sub-Saharan Africa: A systematic review." *PLoS ONE* **17**(2): e0263663.
- Nkhoma, L., D. C. Sitali and J. M. Zulu (2022). "Integration of family planning into HIV services: a systematic review." *Annals of Medicine* **54**(1): 393-403.

Nugent, R., R. V. Barnabas, I. Golovaty, B. Osetinsky, D. A. Roberts, C. Bisson, L. Courtney, P. Patel, G. Yonga and D. Watkins (2018). "Costs and cost-effectiveness of HIV/noncommunicable disease integration in Africa: From theory to practice." *AIDS* **32**(Supplement 1): S83-S92.

O'Neil, A., K. Sanderson, B. Oldenburg and C. B. Taylor (2011). "Impact of depression treatment on mental and physical health-related quality of life of cardiac patients: a meta-analysis." *Journal of cardiopulmonary rehabilitation and prevention* **31**(3): 146-156.

O'Shea, J., M. Ledwidge, J. Gallagher, C. Keenan and C. Ryan (2022). "Pharmacogenetic interventions to improve outcomes in patients with multimorbidity or prescribed polypharmacy: a systematic review." *Pharmacogenomics Journal* **22**(2): 89-99.

Okusanya, B., L. J. Kimaru, N. Mantina, L. B. Gerald, S. Pettygrove, D. Taren and J. Ehiri (2022). "Interventions to increase early infant diagnosis of HIV infection: A systematic review and meta-analysis." *PLoS ONE* **17**(2): e0258863.

Osborn, R. L., A. C. Demoncada and M. Feuerstein (2006). "Psychosocial interventions for depression, anxiety, and quality of life in cancer survivors: meta-analyses." *International journal of psychiatry in medicine* **36**(1): 13-34.

Ouwens, M., M. Hulscher, R. Hermens, M. Faber, H. Marres, H. Wollersheim and R. Grol (2009). "Implementation of integrated care for patients with cancer: a systematic review of interventions and effects." *Int J Qual Health Care* **21**(2): 137-144.

Panagioti, M., P. Bower, E. Kontopantelis, K. Lovell, S. Gilbody, W. Waheed, C. Dickens, J. Archer, G. Simon, K. Ell, J. C. Huffman, D. A. Richards, C. van der Feltz-Cornelis, D. A. Adler, M. Bruce, M. Buszewicz, M. G. Cole, K. W. Davidson, P. de Jonge, J. Gensichen, K. Huijbregts, M. Menchetti, V. Patel, B. Rollman, J. Shaffer, M. C. Zijlstra-Vlasveld and P. A. Coventry (2016). "Association Between Chronic Physical Conditions and the Effectiveness of Collaborative Care for Depression: An Individual Participant Data Meta-analysis." *JAMA psychiatry* **73**(9): 978-989.

Patel, A. and M. Jafferany (2020). "Multidisciplinary and Holistic Models of Care for Patients With Dermatologic Disease and Psychosocial Comorbidity: A Systematic Review." *JAMA Dermatol* **156**(6): 686-694.

Patel, P., C. E. Rose, P. Y. Collins, B. Nuche-Berenguer, V. V. Sahasrabudde, E. Peprah, S. Vorkoper, S. D. Pastakia, D. Rausch, N. S. Levitt and N. H. N. P. D. C. T. O. Group (2018). "Noncommunicable diseases among HIV-infected persons in low-income and middle-income countries: a systematic review and meta-analysis." *AIDS (London, England)* **32** **Suppl 1**: S5-S20.

Poot, C. C., E. Meijer, A. L. Kruis, N. Smidt, N. H. Chavannes and P. J. Honkoop (2021). "Integrated disease management interventions for patients with chronic obstructive pulmonary disease." *Cochrane Database Syst Rev* **9**(9): Cd009437.

Robb, S. L. and D. Hanson-Abromeit (2014). "A review of supportive care interventions to manage distress in young children with cancer and parents." *Cancer Nursing* **37**(4): E1-E26.

Robertson, J., S. Baines, E. Emerson and C. Hatton (2017). "Service Responses to People with Intellectual Disabilities and Epilepsy: A Systematic Review." *Journal of applied research in intellectual disabilities* : **JARID** **30**(1): 1-32.

Rutledge, T., L. S. Redwine, S. E. Linke and P. J. Mills (2013). "A meta-analysis of mental health treatments and cardiac rehabilitation for improving clinical outcomes and depression among patients with coronary heart disease." *Psychosomatic medicine* **75**(4): 335-349.

Sabri, B. and A. Gielen (2019). "Integrated Multicomponent Interventions for Safety and Health Risks Among Black Female Survivors of Violence: A Systematic Review." Trauma Violence Abuse **20**(5): 720-731.

Savage, E., J. Hegarty, E. Weathers, L. Mulligan, C. Bradley, C. Condon, J. Cronly, E. Lehane, A. O. Reilly, I. Hartigan, A. Horgan, J. Browne, M. Vera, M. Aileen, C. Jodi, F. Moira and D. Jonathan (2016). "Transforming Chronic Illness Management through Integrated Care: A Systematic Review of What Works Best and Why." International Journal of Integrated Care (IJIC) **16**(6): 1-2.

Shaw, J., S. Sethi, L. Vaccaro, L. Beatty, L. Kirsten, D. Kissane, B. Kelly, G. Mitchell, K. Sherman and J. Turner (2019). "Is care really shared? A systematic review of collaborative care (shared care) interventions for adult cancer patients with depression." BMC health services research **19**(1): 120.

Smith, S. M., H. Soubhi, M. Fortin, C. Hudon and T. O'Dowd (2012). "Managing patients with multimorbidity: Systematic review of interventions in primary care and community settings." BMJ (Online) **345**(7874): e5205.

Socías, M. E., M. Karamouzian, S. Parent, J. Barletta, K. Bird and L. Ti (2019). "Integrated models of care for people who inject drugs and live with hepatitis C virus: A systematic review." Int J Drug Policy **72**: 146-159.

Thombs, B. D., P. de Jonge, J. C. Coyne, M. A. Whooley, N. Frasure-Smith, A. J. Mitchell, M. Zuidersma, C. Eze-Nliam, B. B. Lima, C. G. Smith, K. Soderlund and R. C. Ziegelstein (2008). "Depression screening and patient outcomes in cardiovascular care: a systematic review." Jama **300**(18): 2161-2171.

Uyei, J., D. Coetzee, J. Macinko and S. Guttmacher (2011). Integrated delivery of HIV and tuberculosis services in Sub-Saharan Africa: A systematic review.

Vermunt, N., M. Harmsen, G. P. Westert, M. G. M. Olde Rikkert and M. J. Faber (2017). "Collaborative goal setting with elderly patients with chronic disease or multimorbidity: a systematic review." BMC geriatrics **17**(1): 167.

Zhao, Y., Y. Ma, C. Zhao, J. Lu, H. Jiang, Y. Cao and Y. Xu (2022). "The effect of integrated health care in patients with hypertension and diabetes: a systematic review and meta-analysis." BMC Health Serv Res **22**(1): 603.
