# Supplementary material for: Models of integrated care for multi-morbidity assessed in systematic reviews: a scoping review
Source: PubMed Central journal article supplement (PMC10463690; doi:10.1186/s12913-023-09894-7), 2023-08-23
Supplement: 12913_2023_9894_MOESM4_ESM.pdf [file 12913_2023_9894_MOESM4_ESM.pdf]

## Additional file 4: Components of integrated care (detailed table)

| Study ID                                            | Conditions                                           | Components of integrated care related to:                                                                                 |                                                                                                                                                                                                                                                                                                                                                                                                                                                                                                                                                                                                                                                            |                                       |                                       |                                 |
|-----------------------------------------------------|------------------------------------------------------|---------------------------------------------------------------------------------------------------------------------------|------------------------------------------------------------------------------------------------------------------------------------------------------------------------------------------------------------------------------------------------------------------------------------------------------------------------------------------------------------------------------------------------------------------------------------------------------------------------------------------------------------------------------------------------------------------------------------------------------------------------------------------------------------|---------------------------------------|---------------------------------------|---------------------------------|
|                                                     |                                                      | Where services were provided                                                                                              | Types of services provided                                                                                                                                                                                                                                                                                                                                                                                                                                                                                                                                                                                                                                 | Health professionals involved in care | Coordination and organisation of care | Involvement of patients in care |
| Systematic reviews with included studies from LMICs |                                                      |                                                                                                                           |                                                                                                                                                                                                                                                                                                                                                                                                                                                                                                                                                                                                                                                            |                                       |                                       |                                 |
| Bulstra 2021 (34)                                   | HIV and TB, NCDs, mental health, primary health care | Single facility: <ul style="list-style-type: none"> <li>One-stop-shop</li> <li>Co-location</li> </ul> Multiple facilities | HIV: <ul style="list-style-type: none"> <li>Prevention services</li> <li>Screening</li> <li>HIV testing</li> <li>CD4 and viral load testing</li> <li>HIV self-testing</li> <li>Home-based HIV testing and counselling</li> <li>Linkage to ART care</li> <li>ART</li> <li>ART adherence counselling</li> <li>Pre-exposure prophylaxis</li> </ul> NCDs: <ul style="list-style-type: none"> <li>NCD screening</li> <li>Hypertension screening</li> <li>CVD screening</li> <li>Psychological support</li> </ul> Mental health: <ul style="list-style-type: none"> <li>Depression care</li> <li>Depression screening</li> <li>Mental health care</li> </ul> TB: | Not reported                          | Not reported                          | Not reported                    |

|                    |                                        |                                                                                                                  |                                                                                                                                                                                                                                                                                                                                                                                                                                                 |                                                     |                                                                             |                                                                           |
|--------------------|----------------------------------------|------------------------------------------------------------------------------------------------------------------|-------------------------------------------------------------------------------------------------------------------------------------------------------------------------------------------------------------------------------------------------------------------------------------------------------------------------------------------------------------------------------------------------------------------------------------------------|-----------------------------------------------------|-----------------------------------------------------------------------------|---------------------------------------------------------------------------|
|                    |                                        |                                                                                                                  | <ul style="list-style-type: none"> <li>• TB testing</li> <li>• TB Intensive case finding</li> <li>• TB treatment</li> </ul> <p>Cancer:</p> <ul style="list-style-type: none"> <li>• Colorectal and breast cancer screening</li> <li>• Cervical cancer screening</li> </ul> <p>General:</p> <ul style="list-style-type: none"> <li>• Primary health care</li> <li>• Chronic pain relief therapy</li> <li>• Chronic disease management</li> </ul> |                                                     |                                                                             |                                                                           |
| Dudley 2011(23)    | HIV and TB                             | Single facility (TB clinics)                                                                                     | <p>HIV prevention and control</p> <p>HIV testing and counselling</p> <p>TB treatment</p>                                                                                                                                                                                                                                                                                                                                                        | Health workers                                      | Not reported                                                                | Not reported                                                              |
| Kadia 2021 (36)    | HIV and TB                             | Single facility                                                                                                  | Treatment for HIV and TB                                                                                                                                                                                                                                                                                                                                                                                                                        | Not reported                                        | Not reported                                                                | Not reported                                                              |
| Nyirenda 2022 (40) | Tuberculosis and Diabetes              | Single facility                                                                                                  | <p>Screening of TB in patients with Diabetes</p> <p>Screening of Diabetes in patients with TB</p> <p>Bi-directional screening</p>                                                                                                                                                                                                                                                                                                               | Not reported                                        | Not reported                                                                | Not reported                                                              |
| Rohwer 2021 (41)   | Diabetes and/or hypertension and other | <p>Single facility:</p> <ul style="list-style-type: none"> <li>• Co-location</li> <li>• One-stop-shop</li> </ul> | <p>Diabetes:</p> <ul style="list-style-type: none"> <li>• Testing</li> <li>• Treatment</li> </ul> <p>Hypertension:</p>                                                                                                                                                                                                                                                                                                                          | <p>Primary health care nurses</p> <p>Physicians</p> | <p>Training of healthcare providers</p> <p>Appointments to initiate ART</p> | <p>Appointment reminders (letters, phone, sms)</p> <p>Support hotline</p> |

|                  |                            |                                                                                                           |                                                                                                                                                                                                                                                                                                                                                                                                              |                           |                                                                                                                                                                                                                                                                                                                                                                                                            |                       |
|------------------|----------------------------|-----------------------------------------------------------------------------------------------------------|--------------------------------------------------------------------------------------------------------------------------------------------------------------------------------------------------------------------------------------------------------------------------------------------------------------------------------------------------------------------------------------------------------------|---------------------------|------------------------------------------------------------------------------------------------------------------------------------------------------------------------------------------------------------------------------------------------------------------------------------------------------------------------------------------------------------------------------------------------------------|-----------------------|
|                  | diseases (HIV, depression) | Community                                                                                                 | <ul style="list-style-type: none"> <li>• Testing</li> <li>• Treatment</li> </ul> <p>HIV:</p> <ul style="list-style-type: none"> <li>• Testing</li> <li>• Linkage to care</li> <li>• ART</li> </ul> <p>Depression:</p> <ul style="list-style-type: none"> <li>• Screening</li> <li>• Management</li> </ul> <p>General:</p> <ul style="list-style-type: none"> <li>• Health promotion and education</li> </ul> | Ward-based outreach teams | <p>Designated chronic care area at facility</p> <p>Supply of critical medicines</p> <p>Pre-packaging of medications</p> <p>Clinical management support (treatment guidelines, algorithms, electronic decision-support)</p> <p>Expanded prescribing provisions for nurses</p> <p>Key treatment messages displayed</p> <p>Onsite supervision/support</p> <p>Additional staff</p> <p>Appropriate referral</p> | Educational pamphlets |
| Sigfrid 2017(29) | HIV and cervical cancer    | <p>Single facility:</p> <ul style="list-style-type: none"> <li>• Within clinic (one-stop shop)</li> </ul> | <p>Cervical cancer screening</p> <p>Treatment of minor lesions</p> <p>Treatment of larger lesions</p> <p>Referral</p> <p>Education and counselling</p> <p>Outreach awareness campaign</p>                                                                                                                                                                                                                    | not reported              | Coordination of local experts and pathologists                                                                                                                                                                                                                                                                                                                                                             | not reported          |

|                                                                                        |                       |                                                                                                                  |                                                                                                                                                                                                                                     |                                   |                                                                                                                                                                                                                                                                |              |
|----------------------------------------------------------------------------------------|-----------------------|------------------------------------------------------------------------------------------------------------------|-------------------------------------------------------------------------------------------------------------------------------------------------------------------------------------------------------------------------------------|-----------------------------------|----------------------------------------------------------------------------------------------------------------------------------------------------------------------------------------------------------------------------------------------------------------|--------------|
|                                                                                        |                       | <p>Single facility:</p> <ul style="list-style-type: none"> <li>Co-location (clinics at same facility)</li> </ul> | <p>Counselled and referred for screening</p> <p>Cervical cancer screening</p> <p>Treatment of minor lesions</p> <p>Referral of any treatment</p> <p>Referral of complex lesions</p>                                                 | HIV and gynecological specialists | <p>Coordination of ART and reproductive units with bidirectional referral and patient tracking</p> <p>Coordination of mobile unit and ART clinic</p> <p>Coordination between HIV and Cancer screening clinics</p> <p>Care coordinated by specialist nurse</p>  | not reported |
|                                                                                        |                       | Multiple facilities                                                                                              | <p>Cervical cancer screening</p> <p>Treatment of minor lesions</p> <p>Treatment of larger lesions</p> <p>Referral</p> <p>Counselling</p> <p>HIV screening and referral</p> <p>Community awareness for Cervical cancer screening</p> | not reported                      | <p>Coordination with external center and lay health workers to ensure follow-up</p> <p>Coordinated referral between reproductive and child health and HIV clinics</p> <p>Coordination with external pathologists</p> <p>Coordinated referral and follow-up</p> | not reported |
| Systematic reviews with included studies from low-, middle-, and high-income countries |                       |                                                                                                                  |                                                                                                                                                                                                                                     |                                   |                                                                                                                                                                                                                                                                |              |
| Chuah 2017(22)                                                                         | HIV and mental health | Single facility                                                                                                  | Not reported                                                                                                                                                                                                                        | Not reported                      | <p>Case conferences</p> <p>Shared medical notes and individual discussions</p> <p>Internal referral system</p>                                                                                                                                                 | Not reported |

|                  |                                                                                         |                                   |                                                         |                                                                                                                                              |                                                                                 |                                                   |
|------------------|-----------------------------------------------------------------------------------------|-----------------------------------|---------------------------------------------------------|----------------------------------------------------------------------------------------------------------------------------------------------|---------------------------------------------------------------------------------|---------------------------------------------------|
|                  |                                                                                         |                                   |                                                         |                                                                                                                                              | Joint consultations                                                             |                                                   |
|                  |                                                                                         | Multiple facilities               | Referral between services                               | Not reported                                                                                                                                 | Collaborative networks and referral mechanisms<br>Case discussions              | Not reported                                      |
|                  |                                                                                         | Not reported                      | For mental health patients:<br>Referral to HIV services | Nurse<br>Primary care staff<br>Social worker<br>Depression-care manager                                                                      | Case management                                                                 | Patient-led coordination of care                  |
| Haldane 2018(24) | HIV and cardiovascular disease, hypertension or diabetes                                | Single facility                   | Treatment<br>Screening and referral                     | multi-disciplinary teams of doctors, nurses, community workers, nutritionists, AIDS officers and pharmacists<br><br>community health workers | medical record tagging                                                          | Patient perspectives<br>Self-management           |
| John 2020 (35)   | Various conditions including Diabetes, Hypertension, depression, coronary heart disease | Not reported                      | Not reported                                            | Multidisciplinary team                                                                                                                       | Coordinated care<br>Continuity of care<br>Data driven quality of care           | Patient engagement<br>Self-management plans       |
| Lee 2021 (38)    | Diabetes and hypertension                                                               | Single facility:<br>• Co-location | Group educational sessions                              | MDT including: Physician, endocrinologist, dietician, nutritionist, pharmacists, physical                                                    | Regular team meetings (bi-weekly, weekly, daily)<br>Shared medical appointments | Communication (face-to-face, online, phone calls) |

|                                                                     |                             |                         |                                                                       |                                                                                                                                                 |                                                                                                                                                                                                                      |                                                                                                                      |
|---------------------------------------------------------------------|-----------------------------|-------------------------|-----------------------------------------------------------------------|-------------------------------------------------------------------------------------------------------------------------------------------------|----------------------------------------------------------------------------------------------------------------------------------------------------------------------------------------------------------------------|----------------------------------------------------------------------------------------------------------------------|
|                                                                     |                             |                         |                                                                       | therapist, psychologist, nurse, diabetes specialist, educator, exercise specialist, social worker, pharmacists, optometry faculty and students, | Shared electronic medical records<br>Case management<br>Collaborative practice agreement<br>Treatment plans<br>Consultant services<br>Caseload tracking<br>Clinical practice guidelines<br>Medication reconciliation | Patient-centred medical home                                                                                         |
| Systematic reviews with included studies from high-income countries |                             |                         |                                                                       |                                                                                                                                                 |                                                                                                                                                                                                                      |                                                                                                                      |
| Atlantis 2014(21)                                                   | Diabetes and depression     | Not reported            | Treatment maintenance and relapse prevention<br>Referral<br>Education | Nurse<br>Psychologist<br>Nurse plus general practitioner                                                                                        | Stepped care framework<br>Supervised case-manager                                                                                                                                                                    | Problem-solving therapy<br>Goal setting<br>Self-monitoring education<br>Self-care education<br>Patient-centered care |
| Hopman 2016(25)                                                     | Multiple chronic conditions | Home<br>Single facility | Not reported                                                          | Medical groups and physician networks<br>Nurse<br>General practitioner                                                                          | Case manager<br>Follow up appointments<br>Prevention of hospital readmission<br>Decision support<br>Clinical information system<br>Delivery system design                                                            | Self-management<br>Community resources                                                                               |

|                    |                                                                                                        |                                                                                            |                                                        |                                                                                                                                                                     |                                                                                                                                                                                                                        |                                                                              |
|--------------------|--------------------------------------------------------------------------------------------------------|--------------------------------------------------------------------------------------------|--------------------------------------------------------|---------------------------------------------------------------------------------------------------------------------------------------------------------------------|------------------------------------------------------------------------------------------------------------------------------------------------------------------------------------------------------------------------|------------------------------------------------------------------------------|
| Huang 2013(26)     | Depression and diabetes                                                                                | Single facility                                                                            | Treatment for depression<br><br>Management of diabetes | MDT: primary care physician, nurse, psychologist                                                                                                                    | Structured management plan<br><br>Enhanced Interprofessional communication<br><br>scheduled follow-up                                                                                                                  | Not reported                                                                 |
| Kappelin 2021 (37) | Diabetes, COPD, Congestive heart disease, Asthma, Musculoskeletal pain, Acute coronary heart syndrome, | Primary care or community setting                                                          | Psychological treatment                                | Physician or advanced practice nurse, plus a care manager (social work specialist, research coordinator, psychologist, problem-solving technique specialist, nurse) | Structured management plan (stepped care model, care plan, education)<br><br>Scheduled follow-up appointments (telephonic or face-to-face)<br><br>Enhanced interprofessional communication (written or oral)           | Support for self-care<br><br>Problem-solving techniques                      |
| Kastner 2018(27)   | Diabetes and depression, diabetes and cardiovascular disease, heart failure and COPD                   | PHC facilities<br><br>Home<br><br>Outpatient clinics<br><br>Hospitals<br><br>Nursing homes | Education<br><br>Cognitive behavioural therapy         | Multi-disciplinary teams                                                                                                                                            | Case management<br><br>Disease management<br><br>Care pathway<br><br>Facilitated relay<br><br>Electronic clinical decision support system<br><br>Computer-based counselling system<br><br>Telemedicine<br><br>Telecare | Self-management<br><br>Patient empowerment<br><br>Medication self-management |
| Li 2017(28)        | Cancer and depression                                                                                  | Home                                                                                       | Therapy for depression                                 | not reported                                                                                                                                                        | Telephone monitoring and relapse prevention                                                                                                                                                                            | Problem-solving therapy                                                      |

|                   |                                                                                                     |                                                           |                                                                                                                |                                                                                                                                                                                         |                                                                                                                                                                                                                                                                |                                                                                                                                                                                          |
|-------------------|-----------------------------------------------------------------------------------------------------|-----------------------------------------------------------|----------------------------------------------------------------------------------------------------------------|-----------------------------------------------------------------------------------------------------------------------------------------------------------------------------------------|----------------------------------------------------------------------------------------------------------------------------------------------------------------------------------------------------------------------------------------------------------------|------------------------------------------------------------------------------------------------------------------------------------------------------------------------------------------|
|                   |                                                                                                     |                                                           |                                                                                                                |                                                                                                                                                                                         | Automatic symptom monitoring                                                                                                                                                                                                                                   |                                                                                                                                                                                          |
|                   |                                                                                                     |                                                           |                                                                                                                |                                                                                                                                                                                         | Follow-up                                                                                                                                                                                                                                                      |                                                                                                                                                                                          |
| Martens 2021 (39) | Severe mental illness and various other chronic diseases (Diabetes, CVD risk factors, dyslipidemia) | Not reported                                              | Screening<br>Counselling<br>Psychological treatment<br>Behavioural interventions                               | MDT<br>Nurse care manager<br>Psychiatrist,<br>Advanced practice nurse<br>Endocrinologist consultant<br>Peer specialists                                                                 | Team meetings<br>Training of team<br>Individualised health plan<br>Coordination of care<br>Case manager<br>Regular team meetings<br>Care management                                                                                                            | Education materials<br>Health education<br>Support to attend medical appointments<br>Self-management support<br>Lifestyle coaching<br>Shared care-plans<br>Peer coaching<br>Peer support |
| Smith 2021a(30)   | Multiple chronic conditions                                                                         | Home-based care<br>Multiple facilities<br>Single facility | Diagnosis<br>Treatment<br>Education<br>Preventive care<br>Pharmaceutical care<br>Cognitive behavioural therapy | Family physician<br>Nurse<br>Occupational therapist<br>Physical therapist<br>Primary care practitioner<br>Psychologist<br>Dietician<br>Social worker<br>Endocrinologist<br>Psychiatrist | Case management<br>Regular planned participant visits<br>Weekly team meetings<br>Stepped care<br>Peer support through group meetings<br>Multidisciplinary team management<br>Structured visits with nurses<br>Individualised care plans and treatment targets, | Goal setting<br>Self-management support<br>Individualised care plans<br>Patient engagement workshop<br>Patient-oriented intervention                                                     |



|                                 |                                              |                 |                                                                                                                                                                       |                                                                                                                                                                        |                                                                                                                                                                                                                                                                                          |                                                                                                                                                                                                              |
|---------------------------------|----------------------------------------------|-----------------|-----------------------------------------------------------------------------------------------------------------------------------------------------------------------|------------------------------------------------------------------------------------------------------------------------------------------------------------------------|------------------------------------------------------------------------------------------------------------------------------------------------------------------------------------------------------------------------------------------------------------------------------------------|--------------------------------------------------------------------------------------------------------------------------------------------------------------------------------------------------------------|
|                                 |                                              |                 |                                                                                                                                                                       |                                                                                                                                                                        | Follow up phone calls                                                                                                                                                                                                                                                                    |                                                                                                                                                                                                              |
| Smith 2021b (42)                | Multimorbidity (various conditions)          | Not reported    | Not reported                                                                                                                                                          | MDT<br>Nurses<br>Physicians<br>Chronic disease and management professionals (Nursing, physical activity, nutrition, respiratory therapy, smoking cessation)<br>Coaches | Home assessments<br>Coordination of care<br>Monthly monitoring<br>Patient care plans<br>Group practices<br>Structured extended GP consultations and relationship continuity<br>Practitioner support and training<br>Continuity of care<br>IT support<br>GP training<br>Medication review | Self-management support<br>Shared care plan<br>Goal setting<br>Focus on patient priorities<br>Education materials<br>Telephone coaching<br>Workshop and telephone calls before and after medical appointment |
| Tully 2015(31)                  | Coronary heart disease and Depression        | Not reported    | Treatment for depression: Problem-solving therapy, Cognitive behavioural therapy, Pharmacotherapy<br><br>Education<br><br>Referral to community mental health service | Allied health team<br><br>Nurse<br><br>Social worker<br><br>Primary care physician<br><br>Psychiatrist<br><br>Physician                                                | Telephone follow-up<br><br>Stepped care approach<br><br>Structured follow-up<br><br>Feedback to PCP                                                                                                                                                                                      | Patient preferences for care<br><br>Development of patient goals                                                                                                                                             |
| Van Eck van der Sluijs 2018(32) | Chronic diseases and depression or dysthymia | Single facility | Diagnosis<br><br>Treatment for chronic condition                                                                                                                      | Case manager<br><br>General practitioner<br><br>Psychiatrist                                                                                                           | Case management                                                                                                                                                                                                                                                                          | Not reported                                                                                                                                                                                                 |

|                 |                                 |              |                                                                                                                                                          |                                                                                           |                                                               |                                                                                                                                        |
|-----------------|---------------------------------|--------------|----------------------------------------------------------------------------------------------------------------------------------------------------------|-------------------------------------------------------------------------------------------|---------------------------------------------------------------|----------------------------------------------------------------------------------------------------------------------------------------|
|                 |                                 |              | Monitoring or psychotherapy for depression/anxiety                                                                                                       |                                                                                           |                                                               |                                                                                                                                        |
| Watson 2013(33) | Chronic diseases and depression | Not reported | Treatment for depression:<br>Pharmacotherapy, Problem-solving therapy, Cognitive behavioural therapy<br><br>Education<br><br>Referral to mental services | Nurse<br><br>Psychologist<br><br>Psychiatrist supervision<br><br>Social worker<br><br>MDT | Stepped care approach<br><br>Monitoring of treatment response | Patient preference for treatment<br><br>Decision support<br><br>Goal setting<br><br>Support for self-care<br><br>Motivational coaching |
